# Supplementary material
Source: Springer Nature journal article supplement (https://www.springermedizin.de/resource/supplementary/12875_2014_1066_MOESM3_ESM.pdf/9436074)

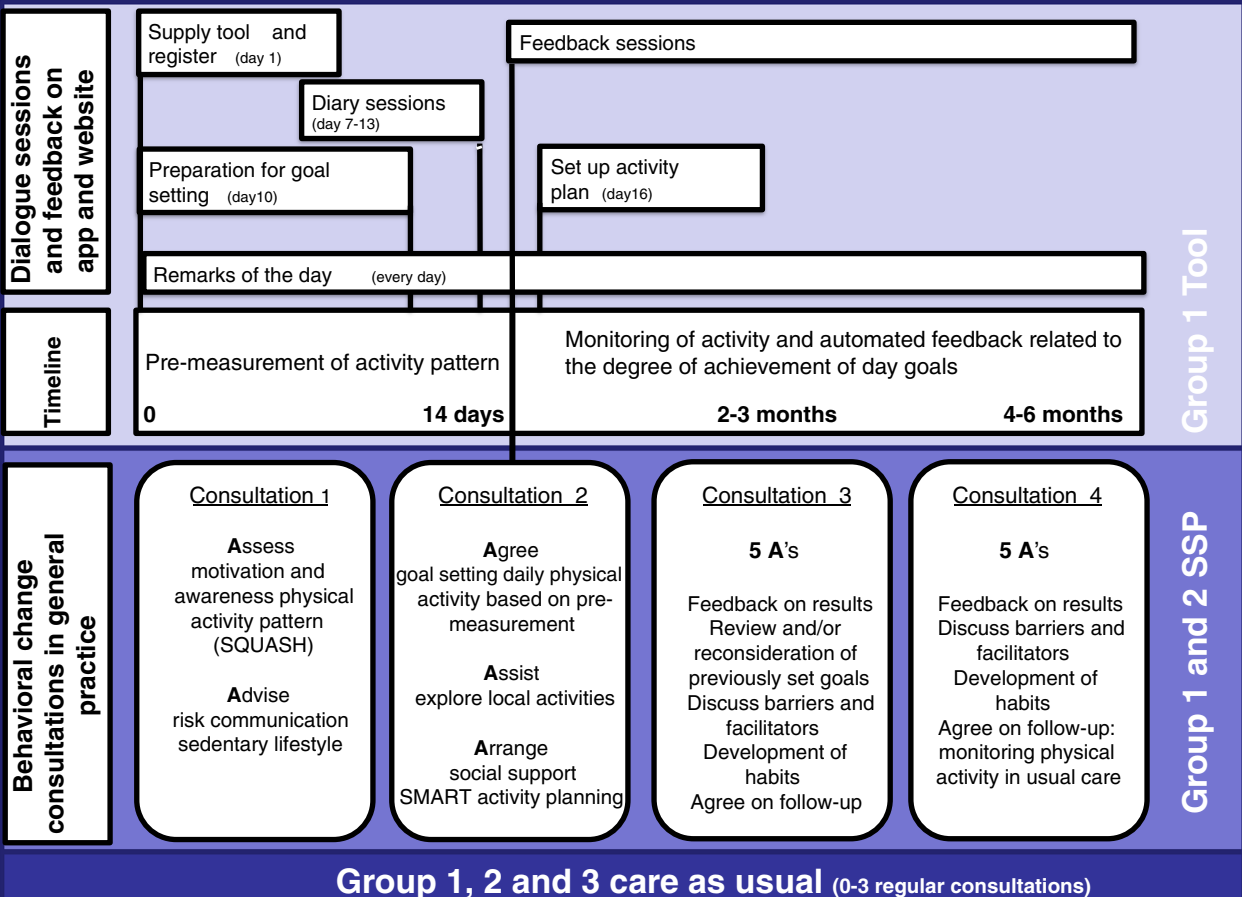

Group 1 Tool

Group 1 and 2 SSP

Supplement: MOESM3 [file 9436074]
